# Supplementary material for: Survey Results of a Pilot Sleep Study Near Atlanta International Airport
Source: PubMed Central journal article supplement (PMC6888482; doi:10.3390/ijerph16224321), 2019-11-06
Supplement: ijerph-16-04321-s001.pdf [file ijerph-16-04321-s001.pdf]

# Supplemental Materials for Survey results of a pilot study on the effects of aircraft noise on sleep near Atlanta International Airport

The complete postal survey is given in *Questionnaire S1*

Demographic data for the sampled census tracts are given in Table S1

Directed acyclic graphs to determine minimal required adjustment for the regression models are given in Figures S1–S3

The number of respondents in each dichotomous outcome category is given in Tables S2–S4

Results of regression model statistical testing (*p*-values) are given in Table S5

## Questionnaire S1 Complete postal survey

|                                                                                                               |                     |
|---------------------------------------------------------------------------------------------------------------|---------------------|
| <b>Q1a.</b> During the <b>past month</b> , at what time have you usually gone to bed on weekdays or workdays? | _____ (HH:MM AM/PM) |
| <b>Q1b.</b> During the <b>past month</b> , at what time have you usually woken up on weekdays or workdays?    | _____ (HH:MM AM/PM) |
| <b>Q1c.</b> During the <b>past month</b> , how much sleep did you usually get on weekdays or workdays?        | _____ (Hours)       |

|                                                                                          |                          |                          |                          |
|------------------------------------------------------------------------------------------|--------------------------|--------------------------|--------------------------|
| <b>Q2.</b> During the <b>past month</b> , how would you rate your sleep quality overall? |                          |                          |                          |
| <b>Very Good</b>                                                                         | <b>Fairly Good</b>       | <b>Fairly Bad</b>        | <b>Very Bad</b>          |
| ▼                                                                                        | ▼                        | ▼                        | ▼                        |
| <input type="checkbox"/>                                                                 | <input type="checkbox"/> | <input type="checkbox"/> | <input type="checkbox"/> |

|                                                                                                                                                |                                  |                              |                             |                                   |
|------------------------------------------------------------------------------------------------------------------------------------------------|----------------------------------|------------------------------|-----------------------------|-----------------------------------|
| <b>Q3.</b> For the following questions, select the response that best reflects how often the following occurred during the <b>past month</b> . |                                  |                              |                             |                                   |
|                                                                                                                                                | <b>Not during the past month</b> | <b>Less than once a week</b> | <b>Once or twice a week</b> | <b>Three or more times a week</b> |
|                                                                                                                                                | ▼                                | ▼                            | ▼                           | ▼                                 |
| <b>Q3a.</b> You had trouble sleeping because you cannot get to sleep within <b>30 minutes</b> ?                                                | <input type="checkbox"/>         | <input type="checkbox"/>     | <input type="checkbox"/>    | <input type="checkbox"/>          |
| <b>Q3b.</b> You had trouble sleeping because you wake up in the middle of the night or early morning?                                          | <input type="checkbox"/>         | <input type="checkbox"/>     | <input type="checkbox"/>    | <input type="checkbox"/>          |
| <b>Q3c.</b> You have taken medicine (prescribed or “over the counter”) to help you sleep?                                                      | <input type="checkbox"/>         | <input type="checkbox"/>     | <input type="checkbox"/>    | <input type="checkbox"/>          |
| <b>Q3d.</b> You had trouble staying awake while driving, eating meals, or engaging in social activity?                                         | <input type="checkbox"/>         | <input type="checkbox"/>     | <input type="checkbox"/>    | <input type="checkbox"/>          |

| Q4. How often in the <b>past month</b> have you done the following because of noise when trying to sleep at home? |                          |                          |                          |                          |                          |
|-------------------------------------------------------------------------------------------------------------------|--------------------------|--------------------------|--------------------------|--------------------------|--------------------------|
|                                                                                                                   | Never<br>1<br>▼          | Rarely<br>2<br>▼         | Sometimes<br>3<br>▼      | Often<br>4<br>▼          | Always<br>5<br>▼         |
| Q4a. Wear earplugs or headphones                                                                                  | <input type="checkbox"/> | <input type="checkbox"/> | <input type="checkbox"/> | <input type="checkbox"/> | <input type="checkbox"/> |
| Q4b. Use alcohol                                                                                                  | <input type="checkbox"/> | <input type="checkbox"/> | <input type="checkbox"/> | <input type="checkbox"/> | <input type="checkbox"/> |
| Q4c. Use medication                                                                                               | <input type="checkbox"/> | <input type="checkbox"/> | <input type="checkbox"/> | <input type="checkbox"/> | <input type="checkbox"/> |
| Q4d. Turn on the TV                                                                                               | <input type="checkbox"/> | <input type="checkbox"/> | <input type="checkbox"/> | <input type="checkbox"/> | <input type="checkbox"/> |
| Q4e. Turn on music                                                                                                | <input type="checkbox"/> | <input type="checkbox"/> | <input type="checkbox"/> | <input type="checkbox"/> | <input type="checkbox"/> |
| Q4f. Close windows                                                                                                | <input type="checkbox"/> | <input type="checkbox"/> | <input type="checkbox"/> | <input type="checkbox"/> | <input type="checkbox"/> |
| Q4g. Use a sound machine                                                                                          | <input type="checkbox"/> | <input type="checkbox"/> | <input type="checkbox"/> | <input type="checkbox"/> | <input type="checkbox"/> |
| Q4h. Turn on a fan                                                                                                | <input type="checkbox"/> | <input type="checkbox"/> | <input type="checkbox"/> | <input type="checkbox"/> | <input type="checkbox"/> |

| Q5. For the following statements respond how strongly you agree or disagree.                   |                             |                          |                          |                          |                          |                          |
|------------------------------------------------------------------------------------------------|-----------------------------|--------------------------|--------------------------|--------------------------|--------------------------|--------------------------|
|                                                                                                | Strongly Disagree<br>1<br>▼ | 2<br>▼                   | 3<br>▼                   | 4<br>▼                   | 5<br>▼                   | Strongly Agree<br>6<br>▼ |
| Q5a. I am easily awakened by noise                                                             | <input type="checkbox"/>    | <input type="checkbox"/> | <input type="checkbox"/> | <input type="checkbox"/> | <input type="checkbox"/> | <input type="checkbox"/> |
| Q5b. I get used to most noises without much difficulty                                         | <input type="checkbox"/>    | <input type="checkbox"/> | <input type="checkbox"/> | <input type="checkbox"/> | <input type="checkbox"/> | <input type="checkbox"/> |
| Q5c. I find it hard to relax in a place that is noisy                                          | <input type="checkbox"/>    | <input type="checkbox"/> | <input type="checkbox"/> | <input type="checkbox"/> | <input type="checkbox"/> | <input type="checkbox"/> |
| Q5d. I am good at concentrating no matter what is going on around me                           | <input type="checkbox"/>    | <input type="checkbox"/> | <input type="checkbox"/> | <input type="checkbox"/> | <input type="checkbox"/> | <input type="checkbox"/> |
| Q5e. I get mad at people who make noise that keeps me from falling asleep or getting work done | <input type="checkbox"/>    | <input type="checkbox"/> | <input type="checkbox"/> | <input type="checkbox"/> | <input type="checkbox"/> | <input type="checkbox"/> |
| Q5f. I am sensitive to noise                                                                   | <input type="checkbox"/>    | <input type="checkbox"/> | <input type="checkbox"/> | <input type="checkbox"/> | <input type="checkbox"/> | <input type="checkbox"/> |

| Q6. Thinking about the <b>last 12 months</b> or so, when you were here at home, how much was your sleep disturbed by noise from the following sources? |                          |                          |                          |                          |                          |
|--------------------------------------------------------------------------------------------------------------------------------------------------------|--------------------------|--------------------------|--------------------------|--------------------------|--------------------------|
|                                                                                                                                                        | Not at all<br>▼          | Slightly<br>▼            | Moderately<br>▼          | Very<br>▼                | Extremely<br>▼           |
| Q6a. Road Traffic                                                                                                                                      | <input type="checkbox"/> | <input type="checkbox"/> | <input type="checkbox"/> | <input type="checkbox"/> | <input type="checkbox"/> |
| Q6b. Trains                                                                                                                                            | <input type="checkbox"/> | <input type="checkbox"/> | <input type="checkbox"/> | <input type="checkbox"/> | <input type="checkbox"/> |
| Q6c. Aircraft                                                                                                                                          | <input type="checkbox"/> | <input type="checkbox"/> | <input type="checkbox"/> | <input type="checkbox"/> | <input type="checkbox"/> |
| Q6d. Industries/Factories                                                                                                                              | <input type="checkbox"/> | <input type="checkbox"/> | <input type="checkbox"/> | <input type="checkbox"/> | <input type="checkbox"/> |
| Q6e. Construction                                                                                                                                      | <input type="checkbox"/> | <input type="checkbox"/> | <input type="checkbox"/> | <input type="checkbox"/> | <input type="checkbox"/> |
| Q6f. Neighbors                                                                                                                                         | <input type="checkbox"/> | <input type="checkbox"/> | <input type="checkbox"/> | <input type="checkbox"/> | <input type="checkbox"/> |
| Q6g. Air Conditioner                                                                                                                                   | <input type="checkbox"/> | <input type="checkbox"/> | <input type="checkbox"/> | <input type="checkbox"/> | <input type="checkbox"/> |

**Q7.** Thinking about the **last 12 months** or so, when you are here at home, how much does noise from each of the following bother, disturb, or annoy you?

|                                  | Not at all<br>▼          | Slightly<br>▼            | Moderately<br>▼          | Very<br>▼                | Extremely<br>▼           |
|----------------------------------|--------------------------|--------------------------|--------------------------|--------------------------|--------------------------|
| <b>Q7a.</b> Road Traffic         | <input type="checkbox"/> | <input type="checkbox"/> | <input type="checkbox"/> | <input type="checkbox"/> | <input type="checkbox"/> |
| <b>Q7b.</b> Trains               | <input type="checkbox"/> | <input type="checkbox"/> | <input type="checkbox"/> | <input type="checkbox"/> | <input type="checkbox"/> |
| <b>Q7c.</b> Aircraft             | <input type="checkbox"/> | <input type="checkbox"/> | <input type="checkbox"/> | <input type="checkbox"/> | <input type="checkbox"/> |
| <b>Q7d.</b> Industries/Factories | <input type="checkbox"/> | <input type="checkbox"/> | <input type="checkbox"/> | <input type="checkbox"/> | <input type="checkbox"/> |
| <b>Q7e.</b> Construction         | <input type="checkbox"/> | <input type="checkbox"/> | <input type="checkbox"/> | <input type="checkbox"/> | <input type="checkbox"/> |
| <b>Q7f.</b> Neighbors            | <input type="checkbox"/> | <input type="checkbox"/> | <input type="checkbox"/> | <input type="checkbox"/> | <input type="checkbox"/> |
| <b>Q7g.</b> Air Conditioner      | <input type="checkbox"/> | <input type="checkbox"/> | <input type="checkbox"/> | <input type="checkbox"/> | <input type="checkbox"/> |

**Q8.** In general, would you say your health is...?

| Poor<br>▼                | Fair<br>▼                | Good<br>▼                | Very Good<br>▼           | Excellent<br>▼           |
|--------------------------|--------------------------|--------------------------|--------------------------|--------------------------|
| <input type="checkbox"/> | <input type="checkbox"/> | <input type="checkbox"/> | <input type="checkbox"/> | <input type="checkbox"/> |

**Q9.** Have you ever been diagnosed by a health professional with any of the following sleep disorders?

- |                                                          |                                     |                                                |
|----------------------------------------------------------|-------------------------------------|------------------------------------------------|
| <input type="checkbox"/> Sleep Apnea                     | <input type="checkbox"/> Narcolepsy | <input type="checkbox"/> Restless Leg Syndrome |
| <input type="checkbox"/> Periodic Limb Movement Syndrome | <input type="checkbox"/> Insomnia   | <input type="checkbox"/> None                  |
| <input type="checkbox"/> Other (please specify): _____   |                                     |                                                |

**Q10.** Do you have any problems or difficulties with your sense of hearing?  Yes  No

**Q11a.** Have you ever been diagnosed by a health professional with the following conditions (mark all that apply)?

- Hypertension/High blood pressure
- Chronic headaches/Migraines
- Arrhythmia/Irregular heartbeat
- Heart disease
- Stomach ulcer
- Diabetes
- None of the above

**Q11b.** If you have been diagnosed with a condition listed under Q11a, have you been treated for the condition in the **past month**?

- |                              |                             |
|------------------------------|-----------------------------|
| <input type="checkbox"/> Yes | <input type="checkbox"/> No |
| <input type="checkbox"/> Yes | <input type="checkbox"/> No |
| <input type="checkbox"/> Yes | <input type="checkbox"/> No |
| <input type="checkbox"/> Yes | <input type="checkbox"/> No |
| <input type="checkbox"/> Yes | <input type="checkbox"/> No |
| <input type="checkbox"/> Yes | <input type="checkbox"/> No |

**Q12.** What is your marital status?

- Single
- Married
- Widowed
- Separated
- Divorced
- Domestic Partners

**Q13.** What was your total household income last year?

- < \$25,000
- \$25,000-\$50,000
- \$50,000-\$75,000
- \$75,000-\$100,000
- \$100,000-\$150,000
- >\$150,000
- Prefer Not to Answer

**Q14.** What is the highest level of education you have completed?

- Less than High School
- High School Graduate
- College Graduate or Higher

**Q15.** What is your current employment status?

- Working
- Unemployed
- Student
- Retired
- Homemaker

**Q16.** If currently employed, does your job require overnight shift work?  
 (Overnight shift work refers to work for at least 4 hours between 12 am midnight to 6 am in the morning)  Yes  No

**Q17.** Are you Hispanic or Latino?  Yes  No  Prefer Not to Answer

**Q18.** What race do you consider yourself to be? (mark all that apply)

American Indian or Alaska Native  Native Hawaiian or Other Pacific Islander

Asian  White

Black or African American  Other (please specify): \_\_\_\_\_

Prefer Not to Answer

**Q19.** Has your current residence received any sound proofing treatment to reduce noise?  Yes  No

**Q20.** How long have you lived at your current residence?

Less than 1 year

1-5 years

5-10 years

More than 10 years

**Q21.** Do you have an air conditioner in your bedroom?

No Unit

Central Air Conditioner

Window Unit

**Q26.** What is your height? \_\_\_\_\_ feet \_\_\_\_\_ inches

**Q27.** What is your weight? \_\_\_\_\_ lbs

**Q24.** Gender:  Male  Female

**Q25.** Age: \_\_\_\_\_ (years)

**Q22.** How many people (including yourself) reside in this household? \_\_\_\_\_

**Q23.** How many children in this household are under the age of 5? \_\_\_\_\_

*Census tract-level demographic data*

**Table S1.** Demographic characteristics of census tracts within each noise category.

| <b>Noise category</b> | <b>Direction re: ATL</b> | <b>Houses (n)</b> | <b>No college education (%)</b> | <b>Black or African American (%)</b> | <b>Mean household income (\$)</b> |
|-----------------------|--------------------------|-------------------|---------------------------------|--------------------------------------|-----------------------------------|
| ≥55 dB                | East                     | 1949              | 59.5                            | 55.1                                 | 33,624                            |
| ≥55 dB                | West                     | 7305              | 50.8                            | 90.7                                 | 26,737                            |
| 50<55 dB              | East                     | 9464              | 59.7                            | 59.6                                 | 31,126                            |
| 50<55 dB              | West                     | 11,123            | 34.8                            | 77.3                                 | 40,938                            |
| 45<50 dB              | East                     | 14,489            | 46.3                            | 83.6                                 | 46,964                            |
| 45<50 dB              | West                     | 20,457            | 32.2                            | 32.2                                 | 59,955                            |
| 40>45 dB              | East                     | 53,391            | 41.9                            | 77.4                                 | 50,249                            |
| 40>45 dB              | West                     | 30,674            | 45.1                            | 81.2                                 | 39,677                            |
| <40 dB                | East                     | 118,182           | 35.7                            | 52.7                                 | 50,684                            |
| <40 dB                | West                     | 55,842            | 41.1                            | 58.5                                 | 54,040                            |
| All                   | -                        | 322,876           | 40.0                            | 62.5                                 | 49,100                            |

The total mean household income was calculated as  $(\sum(\text{houses per tract} \times \text{mean household income age per tract})) / \text{total number of houses in all tracts}$ . Similarly, the total mean percentages that had no college education or were Black or African American were calculated based on proportions and number of houses in each sampling region, e.g.  $(\sum(\text{houses per tract} \times \% \text{ per tract})) / \text{total number of houses in all tracts}$ .

## Directed Acyclic Graphs (DAGs)

According to the DAGs, for all outcomes, to estimate the total effect of  $L_{night}$ , the regression models should be minimally adjusted for age and household income.

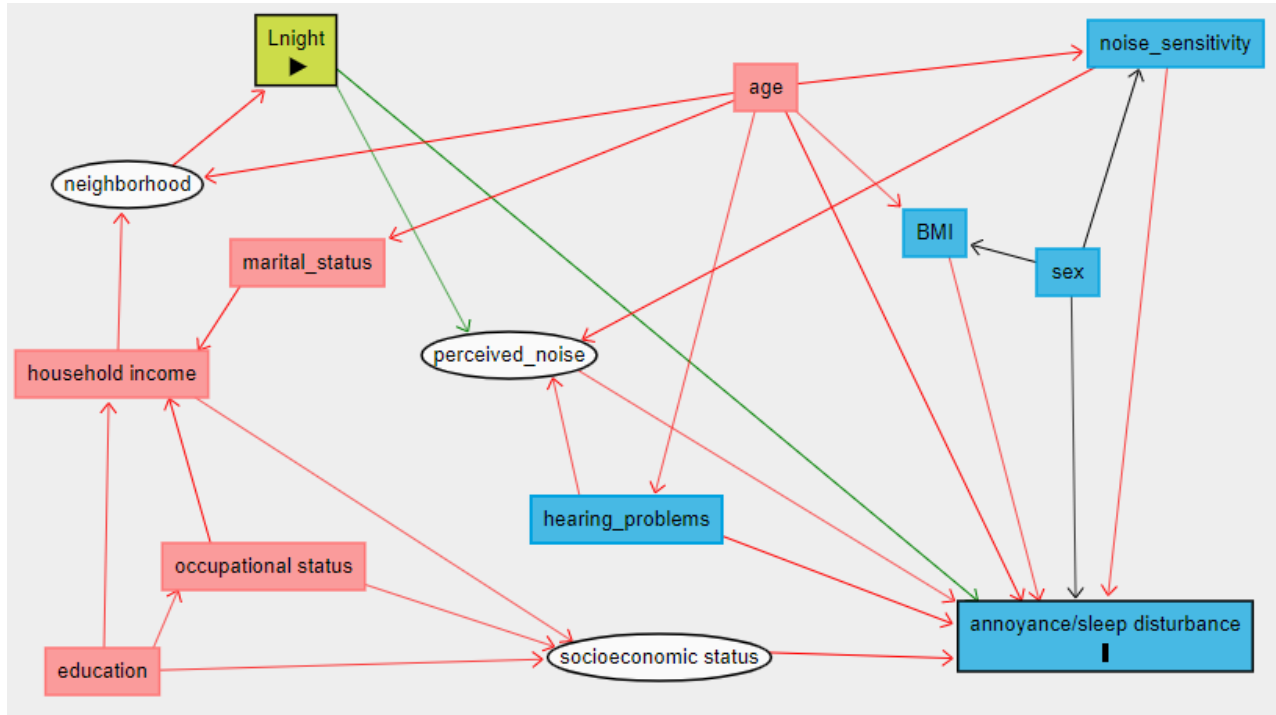

**Figure S1.** DAG for annoyance/sleep disturbance. To estimate the total effect of  $L_{night}$ , the model should be minimally adjusted for age and household income. Ovals indicate unmeasured variables.

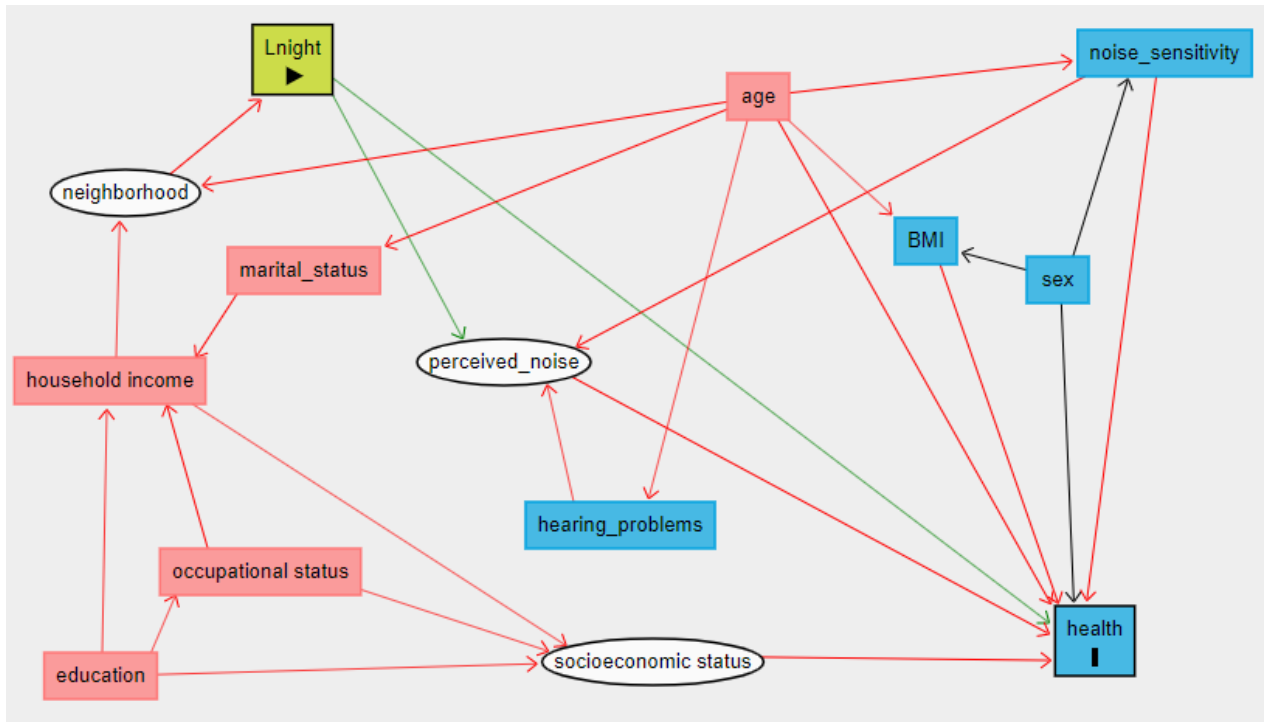

**Figure S2.** DAG for health outcomes. To estimate the total effect of  $L_{night}$ , the model should be minimally adjusted for age and household income. Ovals indicate unmeasured variables.

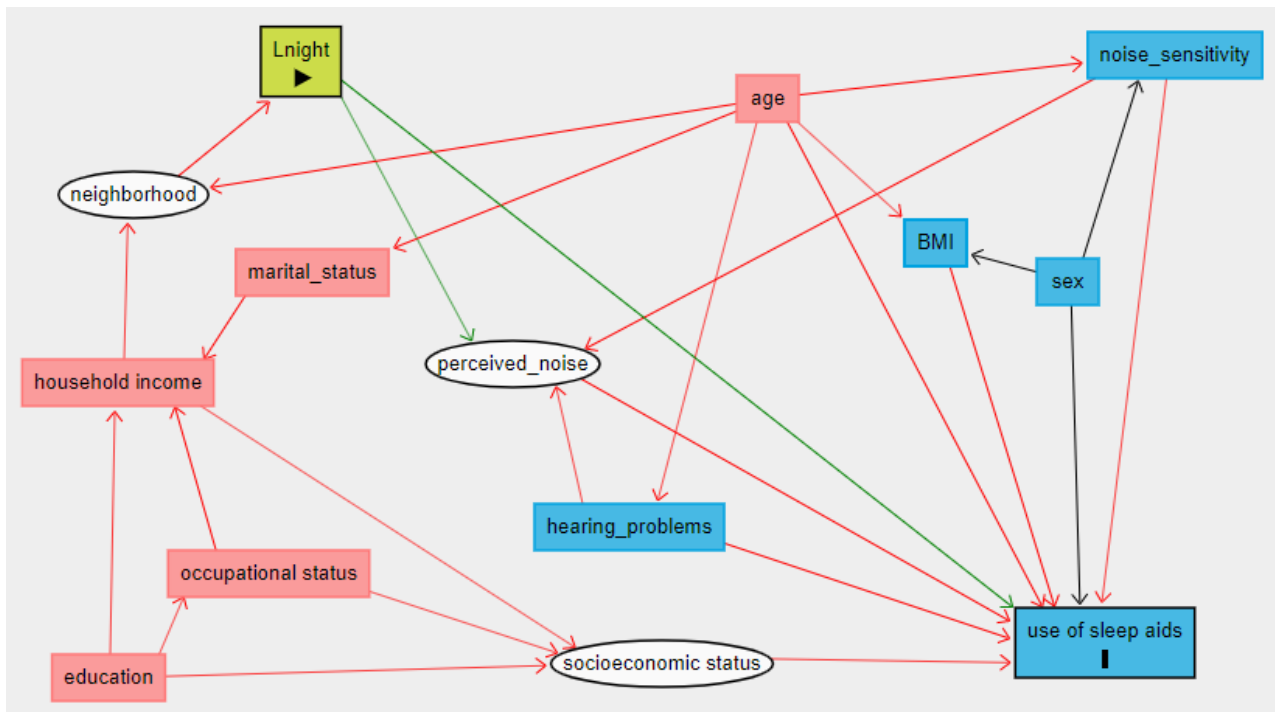

**Figure S3.** DAG for use of sleep aids. To estimate the total effect of  $L_{night}$ , the model should be minimally adjusted for age and household income. Ovals indicate unmeasured variables.

*Prevalence of questionnaire outcome responses*

These tables give the number of responses in each dichotomous response variable.

**Table S2.** Respondents (n) indicating being disturbed and annoyed by aircraft noise, fair or poor sleep quality, and trouble sleeping due to noise  $\geq 1$ /week.

| Response                                        | Outcome Measure   |           |                       |                        |                           |                  |                       |
|-------------------------------------------------|-------------------|-----------|-----------------------|------------------------|---------------------------|------------------|-----------------------|
|                                                 | Sleep disturbance | Annoyance | Overall sleep quality | Trouble falling asleep | Trouble sleeping at night | Sleep medication | Trouble staying awake |
| Disturbed/Annoyed/<br>Poor/ $\geq 1$ /week      | 83                | 78        | 86                    | 146                    | 176                       | 45               | 41                    |
| Not disturbed/Not annoyed/<br>Poor/ $< 1$ /week | 180               | 188       | 176                   | 116                    | 86                        | 211              | 217                   |
| Missing                                         | 5                 | 2         | 6                     | 6                      | 6                         | 12               | 10                    |

**Table S3.** Respondents (n) indicating using sleep aids because of noise often or more frequently.

| Response          | Outcome  |         |            |     |       |               |               |     |
|-------------------|----------|---------|------------|-----|-------|---------------|---------------|-----|
|                   | Earplugs | Alcohol | Medication | TV  | Music | Close windows | Sound machine | Fan |
| Often or more     | 17       | 12      | 36         | 78  | 38    | 109           | 13            | 71  |
| Sometimes or less | 242      | 248     | 225        | 181 | 223   | 152           | 247           | 190 |
| Missing           | 9        | 8       | 7          | 9   | 7     | 7             | 8             | 7   |

**Table S4.** Respondents (n) indicating poor or fair general health, diagnosis of any sleep disorder, and diagnosis of relevant health outcomes.

| Response | Outcome Measure |                |              |                                |           |               |               |          |
|----------|-----------------|----------------|--------------|--------------------------------|-----------|---------------|---------------|----------|
|          | General health  | Sleep disorder | Hypertension | Chronic headaches/<br>Migraine | Arrythmia | Heart disease | Stomach ulcer | Diabetes |
| Poor/Yes | 59              | 58             | 125          | 19                             | 19        | 12            | 8             | 34       |
| Good/no  | 207             | 210            | 143          | 249                            | 249       | 256           | 260           | 234      |
| Missing  | 2               | 0              | 0            | 0                              | 0         | 0             | 0             | 0        |



Regression model *p*-values

**Table S5.** *p*-values for covariates included in the crude ( $L_{\text{night}}$  only) and fully adjusted regression model for each questionnaire outcome measure.

|        | Outcome measure            | Model covariate          |                             |        |       |        |         |                   |           |         |                      |
|--------|----------------------------|--------------------------|-----------------------------|--------|-------|--------|---------|-------------------|-----------|---------|----------------------|
|        |                            | $L_{\text{night}}$ crude | $L_{\text{night}}$ adjusted | BMI    | Sex   | Age    | Hearing | Noise sensitivity | \$50–100k | >\$100k | Prefer not to answer |
| Sleep  | Sleep disturbance          | <0.001                   | <0.001                      | 0.022  | 0.889 | 0.929  | 0.498   | 0.001             | 0.065     | 0.022   | 0.326                |
|        | Annoyance                  | <0.001                   | <0.001                      | 0.037  | 0.721 | 0.819  | 0.408   | 0.001             | 0.339     | 0.030   | 0.709                |
|        | Overall sleep quality      | 0.013                    | 0.029                       | 0.907  | 0.962 | 0.593  | 0.341   | 0.010             | 0.805     | 0.494   | 0.603                |
|        | Trouble falling asleep     | 0.002                    | 0.003                       | 0.748  | 0.453 | 0.177  | 0.029   | 0.001             | 0.862     | 0.272   | 0.191                |
|        | Trouble sleeping at night  | 0.019                    | 0.040                       | 0.864  | 0.074 | 0.146  | 0.044   | <0.001            | 0.736     | 0.452   | 0.140                |
|        | Sleep medication           | 0.809                    | 0.525                       | 0.163  | 0.260 | 0.575  | 0.322   | 0.031             | 0.774     | 0.321   | 0.170                |
|        | Trouble staying awake      | 0.016                    | 0.061                       | 0.891  | 0.083 | 0.140  | 0.085   | 0.018             | 0.213     | 0.714   | 0.264                |
| Coping | Earplugs                   | 0.208                    | 0.345                       | 0.032  | 0.859 | 0.907  | 0.068   | 0.101             | 0.148     | 0.531   | 0.911                |
|        | Alcohol                    | 0.028                    | 0.046                       | 0.868  | 0.869 | 0.161  | 0.589   | 0.187             | 0.796     | 0.926   | 0.447                |
|        | Medication                 | 0.608                    | 0.738                       | 0.303  | 0.682 | 0.904  | 0.016   | 0.029             | 0.812     | 0.330   | 0.710                |
|        | TV                         | 0.004                    | 0.011                       | 0.533  | 0.625 | 0.108  | <0.001  | 0.022             | 0.452     | 0.889   | 0.058                |
|        | Music                      | 0.004                    | 0.020                       | 0.160  | 0.675 | 0.000  | 0.001   | 0.855             | 0.514     | 0.332   | 0.989                |
|        | Close windows              | 0.007                    | 0.006                       | 0.074  | 0.603 | 0.146  | 0.889   | 0.055             | 0.961     | 0.282   | 0.066                |
|        | Sound machine              | 0.451                    | 0.744                       | 0.329  | 0.962 | 0.846  | 0.872   | 0.942             | 0.528     | 0.336   | 0.889                |
| Health | Fan                        | 0.212                    | 0.496                       | 0.116  | 0.407 | 0.007  | 0.065   | 0.020             | 0.538     | 0.996   | 0.811                |
|        | General health             | 0.004                    | 0.052                       | 0.001  | 0.398 | 0.565  | 0.049   | 0.469             | 0.529     | 0.056   | 0.536                |
|        | Sleep disorder             | 0.927                    | 0.701                       | 0.003  | 0.618 | 0.010  | 0.074   | 0.137             | 0.752     | 0.143   | 0.277                |
|        | Hypertension               | 0.858                    | 0.990                       | <0.001 | 0.910 | <0.001 | 0.606   | 0.673             | 0.705     | 0.168   | 0.821                |
|        | Chronic headaches/migraine | 0.192                    | 0.383                       | 0.613  | 0.254 | 0.225  | 0.752   | 0.550             | 0.760     | 0.357   | 0.469                |
|        | Arrhythmia                 | 0.525                    | 0.689                       | 0.840  | 0.813 | 0.002  | 0.202   | 0.330             | 0.690     | 0.943   | 0.708                |
|        | Heart disease              | 0.186                    | 0.114                       | 0.614  | 0.344 | 0.014  | 0.255   | 0.976             | 0.629     | 0.979   | 0.615                |
|        | Stomach ulcer              | 0.301                    | 0.381                       | 0.488  | 0.448 | 0.322  | 0.729   | 0.330             | 0.782     | 0.693   | 0.968                |
|        | Diabetes                   | 0.448                    | 0.119                       | 0.001  | 0.662 | <0.001 | 0.778   | 0.518             | 0.428     | 0.696   | 0.028                |
